# Supplementary material
Source: Research Square preprint supplement (doi:10.21203/rs.3.rs-9297502/v1)

**Identification of histone modification genes in strawberry reveals the role of the histone deacetylase FaHDT in fruit ripening**

Yunduan Li1*, Limin Han1*, Jingqi Li1, Li Wang2*,

1College of Biology, Food and Chemistry, Shaanxi Xueqian Normal University, Xi’an 710100, Shaanxi, China

2College of Horticulture, Hebei Agricultural University, Baoding 071000, Hebei, China

*Corresponding authors: Yunduan Li: yunduan.li@nwsuaf.edu.cn (Y.-D.L.), hdd_1981_@163.com (L.-M.H.), vivi@hebau.edu.cn (L. W.).

E-mail addresses of all authors:

Yunduan Li: yunduan.li@nwsuaf.edu.cn

Limin Han: hdd_1981_@163.com

Jingqi Li: lijingqi8625@163.com

Li Wang: vivi@hebau.edu.cn

**Additional file 1: Table S1**. The histone modification genes identified in strawberry (F. vesca) genome.

| **Gene name** | **Accession number** | **Gene ID in *F. vesca*** | **Gene ID in**  ***F. ananassa*** | **Chr** | **Start** | **End** | **CDS (bp)** | **ORF (aa)** |
| --- | --- | --- | --- | --- | --- | --- | --- | --- |
|  | **HMT-SDG** |  |  |  |  |  |  |  |
| *FvSDG1* | XP_004287196.1 | gene30492 | FvH4_1g30000.t1 | 1 | 1294788 | 1303389 | 1116 | 371 |
| *FvSDG2* | XP_011463008.1 | gene23883 | FvH4_6g43760.t1 | 1 | 9540905 | 9553658 | 7509 | 2502 |
| *FvSDG3* | XP_004287921.1 | gene23908 | FvH4_6g43540.t1 | 1 | 9686207 | 9689488 | 1416 | 471 |
| *FvSDG4* | XP_011463980.1 | gene23813 | FvH4_5g39110.t1 | 1 | 10738494 | 10745642 | 2724 | 907 |
| *FvSDG5* | XP_004289409.2 | gene17873 | FvH4_1g24041.t1 | 1 | 15790023 | 15794987 | 1275 | 424 |
| *FvSDG6* | XP_011457659.1 | gene22028 | FvH4_7g31710.t1 | 1 | 20735023 | 20737209 | 1986 | 661 |
| *FvSDG7* | XP_004288574.1 | gene31667 | FvH4_1g27430.t1 | 1 | 20998576 | 21004362 | 1536 | 511 |
| *FvSDG8* | XP_004288643.2 | gene12359 | FvH4_1g25860.t1 | 1 | 22431960 | 22434335 | 1506 | 501 |
| *FvSDG9* | XP_011457909.1 | gene07362 | FvH4_2g02250.t1 | 2 | 4459186 | 4464450 | 1540 | 513 |
| *FvSDG10* | XP_004292239.1 | gene08324 | FvH4_2g20650.t1 | 2 | 6705424 | 6711297 | 2475 | 824 |
| *FvSDG11* | XP_004292255.1 | gene08379 | FvH4_2g20121.t1 | 2 | 7081688 | 7090246 | 2022 | 673 |
| *FvSDG12* | XP_011458495.1 | gene08123 | FvH4_2g13430.t1 | 2 | 13998811 | 14002245 | 1983 | 660 |
| *FvSDG13* | XP_004290832.1 | gene11111 | FvH4_2g26280.t1 | 2 | 18452294 | 18456757 | 1449 | 482 |
| *FvSDG14* | XP_004290913.1 | gene11265 | FvH4_3g25420.t1 | 2 | 19296794 | 19299681 | 1020 | 339 |
| *FvSDG15* | XP_004292727.1 | gene11269 | FvH4_2g27880.t1 | 2 | 19316468 | 19329080 | 6339 | 2112 |
| *FvSDG16* | XP_004292737.1 | gene10999 | FvH4_2g28350.t1 | 2 | 19582979 | 19595850 | 6510 | 2169 |
| *FvSDG17* | XP_004293056.1 | gene21746 | FvH4_3g25420.t1 | 2 | 26540176 | 26545460 | 1038 | 345 |
| *FvSDG18* | XP_004295500.1 | gene19999 | FvH4_4g12820.t1 | 3 | 5800632 | 5804987 | 1236 | 411 |
| *FvSDG19* | XP_004295521.2 | gene19947 | FvH4_3g13130.t1 | 3 | 6109597 | 6114086 | 1458 | 485 |
| *FvSDG20* | XP_011462302.1 | gene11562 | FvH4_4g04470.t1 | 4 | 771025 | 777405 | 2727 | 908 |
| *FvSDG21* | XP_011462326.1 | gene16946 | FvH4_4g08310.t1 | 4 | 2463139 | 2471768 | 1650 | 549 |
| *FvSDG22* | XP_011462566.1 | gene22427 | FvH4_4g12210.t1 | 4 | 7511623 | 7525851 | 3273 | 1090 |
| *FvSDG23* | XP_004298060.2 | gene27657 | FvH4_4g08820.t1 | 4 | 9249341 | 9255308 | 1506 | 501 |
| *FvSDG24* | XP_004298233.1 | gene06630 | FvH4_4g12820.t1 | 4 | 14401987 | 14404015 | 1218 | 405 |
| *FvSDG25* | XP_004296999.2 | gene22755 | FvH4_4g22020.t1 | 4 | 14718536 | 14720121 | 1191 | 396 |
| *FvSDG26* | XP_011463675.1 | gene04693/gene04692 | FvH4_4g30820.t1 | 4 | 17698805 | 17704078 | 1878 | 625 |
| *FvSDG27* | XP_004298417.2 | gene04715 | FvH4_4g31050.t1 | 4 | 17818192 | 17820559 | 1593 | 530 |
| *FvSDG28* | XP_004297442.1 | gene06267 | FvH4_4g33660.t1 | 4 | 19240299 | 19243137 | 1449 | 482 |
| *FvSDG29* | XP_011464984.1 | / | FvH4_5g26810.t1 | 5 | 18619890 | 18628570 | 3603 | 1200 |
| *FvSDG30* | XP_004300446.2 | gene02275 | FvH4_5g39110.t1 | 5 | 24730501 | 24737036 | 2643 | 880 |
| *FvSDG31* | XP_004300536.1 | gene20484 | FvH4_5g25380.t1 | 5 | 25739656 | 25744837 | 3249 | 1082 |
| *FvSDG32* | XP_004300581.1 | gene29411 | FvH4_1g14350.t1 | 5 | 26440292 | 26451084 | 4560 | 1519 |
| *FvSDG33* | XP_004304779.1 | gene16684 | FvH4_6g01620.t1 | 6 | 1216090 | 1220950 | 1533 | 510 |
| *FvSDG34* | XP_004305542.2 | gene18071 | FvH4_6g21530.t1 | 6 | 19145167 | 19149013 | 1089 | 362 |
| *FvSDG35* | XP_004305682.1 | gene15541 | FvH4_6g40490.t1 | 6 | 22667318 | 22671298 | 1497 | 498 |
| *FvSDG36* | XP_004304345.1 | gene02482 | FvH4_7g07980.t1 | 6 | 33232851 | 33235795 | 2106 | 701 |
| *FvSDG37* | XP_004304567.1 | gene01396 | FvH4_6g54300.t1 | 6 | 36623729 | 36630106 | 1953 | 650 |
| *FvSDG38* | XP_011468781.1 | gene00440 | FvH4_2g27880.t1 | 7 | 646812 | 659813 | 3510 | 1169 |
| *FvSDG39* | XP_011468938.1 | gene19197 | FvH4_7g31710.t1 | 7 | 3702665 | 3711603 | 3051 | 1016 |
| *FvSDG40* | XP_011469094.1 | gene18946 | FvH4_7g12930.t1 | 7 | 5978235 | 5984840 | 1698 | 565 |
| *FvSDG41* | XP_004307309.1 | gene03234 | FvH4_7g07980.t1 | 7 | 14189085 | 14192431 | 1992 | 663 |
| *FvSDG42* | XP_004308826.1 | gene23354 | FvH4_7g20720.t1 | 7 | 15918086 | 15922952 | 1383 | 460 |
| *FvSDG43* | XP_004309003.1 | gene21399 | FvH4_7g26380.t1 | 7 | 19275355 | 19280942 | 2343 | 780 |
| *FvSDG44* | XP_004307957.1 | gene12820 | FvH4_1g24041.t1 | 7 | 21173031 | 21176128 | 1032 | 343 |
| *FvSDG45* | XP_011470230.1 | gene12861 | FvH4_7g31710.t1 | 7 | 21387556 | 21394750 | 3234 | 1077 |
| *FvSDG46* | XP_011457368.1 | gene07805 | FvH4_4g04470.t1 | Un | 373087 | 377237 | 1920 | 639 |
| *FvSDG47* | XP_004310138.2 | gene07293 | FvH4_6g54300.t1 | Un | 1840956 | 1847008 | 2088 | 695 |
|  | **HMT-PRMT** |  |  |  |  |  |  |  |
| *FvPRMT1* | XP_004287365.1 | gene30976 | FvH4_1g03880.t1 | 1 | 3382333 | 3385983 | 1143 | 380 |
| *FvPRMT2* | XP_004287525.1 | gene11395 | FvH4_1g06990.t1 | 1 | 5411620 | 5415093 | 1143 | 380 |
| *FvPRMT3* | XP_004296838.1 | gene06895 | FvH4_4g18060.t1 | 4 | 11180791 | 11185970 | 1614 | 537 |
| *FvPRMT4* | XP_004297709.1 | gene00782 | FvH4_4g37250.t1 | 4 | 22411048 | 22415744 | 1242 | 413 |
| *FvPRMT5* | XP_011467207.1 | gene15464 | FvH4_2g30610.t1 | 6 | 20640431 | 20647130 | 1950 | 649 |
|  | **HDM-HDMA** |  |  |  |  |  |  |  |
| *FvHDMA1* | XP_011458806.1 | gene11231 | FvH4_2g27500.t1 | 2 | 19113559 | 19120502 | 2379 | 792 |
| *FvHDMA2* | XP_004292921.1 | gene08618 | FvH4_7g18750.t1 | 2 | 22879396 | 22882197 | 2376 | 791 |
| *FvHDMA3* | XP_011459530.1 | gene15221 | FvH4_2g39110.t1 | 2 | 32136136 | 32145822 | 5730 | 1909 |
| *FvHDMA4* | XP_004295264.1 | gene19598 | FvH4_3g02280.t1 | 3 | 359390 | 361497 | 1422 | 473 |
| *FvHDMA5* | XP_004294498.1 | gene25010 | FvH4_7g18750.t1 | 3 | 16669592 | 16673388 | 2247 | 748 |
| *FvHDMA6* | XP_004297521.1 | gene06487 | FvH4_5g08750.t1 | 4 | 20122079 | 20125293 | 1650 | 549 |
| *FvHDMA7* | XP_004299098.1 | gene20434 | FvH4_2g08620.t1 | 5 | 4676866 | 4682563 | 3009 | 1002 |
| *FvHDMA8* | XP_004308766.1 | gene23463 | FvH4_7g18750.t1 | 7 | 14721336 | 14726713 | 2736 | 911 |
|  | **HDM-JMJ** |  |  |  |  |  |  |  |
| *FvJMJ1* | XP_004292214.1 | gene08108 | FvH4_2g21290.t1 | 2 | 6284929 | 6290317 | 2580 | 859 |
| *FvJMJ2* | XP_011458600.1 | gene20265 | FvH4_2g22940.t1 | 2 | 16158248 | 16164106 | 1707 | 568 |
| *FvJMJ3* | XP_011460014.1 | gene19492 | FvH4_7g31570.t1 | 3 | 715181 | 720393 | 2688 | 895 |
| *FvJMJ4* | XP_011460309.1 | gene30727 | FvH4_3g03760.t1 | 3 | 3613133 | 3618996 | 3153 | 1050 |
| *FvJMJ5* | XP_011460431.1 | gene20120 | FvH4_6g01870.t1 | 3 | 5024712 | 5030278 | 2997 | 998 |
| *FvJMJ6* | XP_004294223.1 | gene10362 | FvH4_3g16420.t1 | 3 | 11831505 | 11834210 | 1047 | 348 |
| *FvJMJ7* | XP_004296345.1 | gene20651 | FvH4_3g43600.t1 | 3 | 27757562 | 27760805 | 1251 | 416 |
| *FvJMJ8* | XP_011463878.1 | gene32474 | FvH4_5g02310.t1 | 5 | 1369297 | 1381810 | 5517 | 1838 |
| *FvJMJ9* | XP_004298971.1 | gene31779 | FvH4_5g05750.t1 | 5 | 3338046 | 3341917 | 1428 | 475 |
| *FvJMJ10* | XP_004301036.1 | gene09903 | FvH4_5g07090.t1 | 5 | 6233535 | 6240416 | 4479 | 1492 |
| *FvJMJ11* | XP_011464603.1 | gene11964 | FvH4_5g36800.t1 | 5 | 11766065 | 11777811 | 2952 | 983 |
| *FvJMJ12* | XP_004301534.1 | gene11798 | FvH4_7g06860.t1 | 5 | 16913891 | 16917237 | 2631 | 876 |
| *FvJMJ13* | XP_004300206.2 | gene13745 | FvH4_5g22980.t1 | 5 | 20766329 | 20772639 | 2595 | 864 |
| *FvJMJ14* | XP_011465287.1 | gene27692 | FvH4_7g31570.t1 | 5 | 23873615 | 23879969 | 2775 | 924 |
| *FvJMJ15* | XP_011465839.1 | gene22017 | FvH4_7g31570.t1 | 5 | 25904018 | 25913180 | 1865 | 621 |
| *FvJMJ16* | XP_004302095.1 | gene16665 | FvH4_6g01870.t1 | 6 | 1114093 | 1121674 | 3657 | 1218 |
| *FvJMJ17* | XP_004302409.1 | gene22503 | FvH4_6g06290.t1 | 6 | 4944979 | 4951366 | 2898 | 965 |
| *FvJMJ18* | XP_004303402.2 | gene18131 | FvH4_6g21050.t1 | 6 | 19669998 | 19673219 | 1638 | 545 |
| *FvJMJ19* | XP_011468930.1 | gene19156 | FvH4_7g31570.t1 | 7 | 3475363 | 3485606 | 3108 | 1035 |
| *FvJMJ20* | XP_011469248.1 | gene04808 | FvH4_7g09570.t1 | 7 | 8381034 | 8392654 | 3827 | 1274 |
| *FvJMJ21* | XP_004308619.1 | gene09210 | FvH4_7g06860.t1 | 7 | 11213803 | 11216475 | 2415 | 804 |
| *FvJMJ22* | XP_004307375.1 | gene23255 | FvH4_7g19090.t1 | 7 | 14989775 | 14997968 | 4773 | 1590 |
| *FvJMJ23* | XP_004309136.1 | gene12874 | FvH4_7g31570.t1 | 7 | 21486523 | 21491646 | 2649 | 882 |
|  | **HAT-HAG** |  |  |  |  |  |  |  |
| *FvHAG1* | XP_004287513.1 | gene11375 | FvH4_1g06820.t1 | 1 | 5306881 | 5310247 | 1383 | 460 |
| *FvHAG2* | XP_004287633.1 | gene12495 | FvH4_1g08620.t1 | 1 | 6744785 | 6748584 | 876 | 291 |
| *FvHAG3* | XP_004288237.1 | gene05728 | FvH4_1g17420.t1 | 1 | 14213687 | 14215501 | 1263 | 420 |
| *FvHAG4* | XP_011466150.1 | gene05768 | FvH4_1g17820.t1 | 1 | 14460123 | 14475611 | 1785 | 594 |
| *FvHAG5* | XP_004289797.2 | gene25543 | FvH4_2g04100.t1 | 2 | 3889421 | 3891085 | 1218 | 405 |
| *FvHAG6* | XP_004289890.1 | gene08185 | FvH4_2g22590.t1 | 2 | 5509354 | 5515334 | 1647 | 548 |
| *FvHAG7* | XP_004292502.2 | gene27542 | FvH4_4g26600.t1 | 2 | 13459941 | 13460598 | 444 | 147 |
| *FvHAG8* | XP_004290574.1 | gene01004 | FvH4_2g15130.t1 | 2 | 15310024 | 15311735 | 477 | 158 |
| *FvHAG9* | XP_004290602.1 | gene20296 | FvH4_2g23390.t1 | 2 | 15856027 | 15859932 | 525 | 174 |
| *FvHAG10* | XP_004290877.1 | gene11188 | FvH4_2g27080.t1 | 2 | 18897001 | 18898058 | 339 | 112 |
| *FvHAG11* | XP_004291489.1 | gene11707 | FvH4_2g29780.t1 | 2 | 24448031 | 24450121 | 498 | 165 |
| *FvHAG12* | XP_004293447.1 | gene21644 | FvH4_6g41300.t1 | 3 | 1669818 | 1672208 | 603 | 200 |
| *FvHAG13* | XP_004294308.1 | gene07948 | FvH4_3g39120.t1 | 3 | 13228966 | 13230885 | 1200 | 399 |
| *FvHAG14* | XP_004295085.1 | gene05131 | FvH4_4g19610.t1 | 3 | 25365161 | 25367155 | 1185 | 394 |
| *FvHAG15* | XP_011462909.1 | gene20405 | FvH4_6g03890.t1 | 4 | 15691816 | 15692594 | 545 | 180 |
| *FvHAG16* | XP_004298274.1 | gene20406 | FvH4_4g26600.t1 | 4 | 15692650 | 15693822 | 558 | 185 |
| *FvHAG17* | XP_004298329.1 | gene04500 | FvH4_4g28730.t1 | 4 | 16716945 | 16717850 | 582 | 193 |
| *FvHAG18* | XP_004297657.1 | gene00689 | FvH4_4g34910.t1 | 4 | 21922963 | 21926233 | 996 | 331 |
| *FvHAG19* | XP_011464080.1 | gene03658 | FvH4_4g26600.t1 | 5 | 3934893 | 3935931 | 543 | 180 |
| *FvHAG20* | XP_004300955.1 | gene03659 | FvH4_4g26610.t1 | 5 | 3936402 | 3936953 | 552 | 183 |
| *FvHAG21* | XP_004299193.1 | gene09922 | FvH4_5g07450.t1 | 5 | 6350369 | 6353407 | 1704 | 567 |
| *FvHAG22* | XP_011464464.1 | gene09329 | FvH4_5g17800.t1 | 5 | 9795687 | 9799237 | 846 | 281 |
| *FvHAG23* | XP_004302006.1 | gene16464 | FvH4_6g03890.t1 | 6 | 91881 | 93330 | 513 | 170 |
| *FvHAG24* | XP_004302517.1 | gene13583 | FvH4_6g09480.t1 | 6 | 6417506 | 6420496 | 741 | 246 |
| *FvHAG25* | XP_004302988.1 | gene30296 | FvH4_6g18700.t1 | 6 | 12544755 | 12546038 | 462 | 153 |
| *FvHAG26* | XP_011466850.1 | gene11999 | FvH4_7g01790.t1 | 6 | 14347506 | 14348427 | 585 | 194 |
| *FvHAG27* | XP_004303239.1 | gene15835 | FvH4_6g28600.t1 | 6 | 16797041 | 16799881 | 1230 | 409 |
| *FvHAG28* | XP_004305586.1 | gene18327 | FvH4_6g20270.t1 | 6 | 20374111 | 20376790 | 1095 | 364 |
| *FvHAG29* | XP_004305700.2 | gene21938 | FvH4_6g24820.t1 | 6 | 23335948 | 23344332 | 1761 | 586 |
| *FvHAG30* | XP_004304570.1 | gene01399 | FvH4_6g54330.t1 | 6 | 36636483 | 36637395 | 489 | 162 |
| *FvHAG31* | XP_004307374.1 | gene23252 | FvH4_7g19050.t1 | 7 | 14961166 | 14962163 | 705 | 234 |
| *FvHAG32* | XP_004307388.1 | gene23290 | FvH4_7g19440.t1 | 7 | 15176241 | 15178905 | 852 | 283 |
| *FvHAG33* | XP_004307753.1 | gene21393 | FvH4_7g26320.t1 | 7 | 19238174 | 19239842 | 852 | 283 |
| *FvHAG34* | XP_011470124.1 | gene12569 | / | 7 | 20263475 | 20266899 | 855 | 284 |
| *FvHAG35* | XP_004307979.1 | gene12860 | FvH4_7g31720.t1 | 7 | 21386216 | 21387509 | 822 | 273 |
| *FvHAG36* | XP_011471061.1 | gene08185 | FvH4_2g22590.t1 | Un | 208251 | 211189 | 417 | 138 |
| *FvHAG37* | XP_004310098.1 | gene07205 | FvH4_4g23510.t1 | Un | 1303980 | 1306360 | 783 | 260 |
|  | **HAT-HAM** |  |  |  |  |  |  |  |
| *FvHAM1* | XP_004300418.1 | gene02241 | FvH4_5g38850.t1 | 5 | 24574881 | 24579424 | 1338 | 445 |
|  | **HAT-HAC** |  |  |  |  |  |  |  |
| *FvHAC1* | XP_004304807.1 | gene16783 | FvH4_6g45470.t1 | 6 | 1730882 | 1734287 | 2760 | 919 |
| *FvHAC2* | XP_011467499.1 | gene05506 | FvH4_6g45470.t1 | 6 | 25560774 | 25571014 | 5163 | 1720 |
| *FvHAC3* | XP_004306030.2 | gene10338 | FvH4_6g45470.t1 | 6 | 30305982 | 30313383 | 4287 | 1428 |
|  | **HAT-HAF** |  |  |  |  |  |  |  |
| *FvHAF1* | XP_004288581.1 | gene30351 | FvH4_3g05980.t1 | 1 | 21577237 | 21595473 | 5556 | 1851 |
| *FvHAF2* | XP_011460172.1 | / | FvH4_3g05980.t1 | 3 | 2265104 | 2272055 | 5430 | 1809 |
|  | **HDAC-HDA** |  |  |  |  |  |  |  |
| *FvHDA1* | XP_004288101.1 | gene16203 | FvH4_1g24510.t1 | 1 | 12415911 | 12424388 | 1338 | 445 |
| *FvHDA2* | XP_004289603.1 | gene12349 | FvH4_5g06060.t1 | 1 | 22370858 | 22372741 | 1242 | 413 |
| *FvHDA3* | XP_004290100.1 | gene17127 | FvH4_2g17240.t1 | 2 | 8294060 | 8298132 | 1488 | 495 |
| *FvHDA4* | XP_004291033.2 | gene02678 | FvH4_2g32010.t1 | 2 | 20433015 | 20436701 | 1176 | 391 |
| *FvHDA5* | XP_004291676.2 | gene27053 | FvH4_3g26560.t1 | 2 | 29133843 | 29135931 | 1200 | 399 |
| *FvHDA6* | XP_004299132.1 | gene09844 | FvH4_5g06060.t1 | 5 | 5620483 | 5624058 | 1395 | 464 |
| *FvHDA7* | XP_004301076.2 | gene26215 | FvH4_5g12660.t1 | 5 | 6961304 | 6967295 | 1716 | 571 |
| *FvHDA8* | XP_011465688.1 | gene25808 | FvH4_5g13910.t1 | 5 | 7679734 | 7684109 | 1767 | 588 |
| *FvHDA9* | XP_004300044.1 | gene29263 | FvH4_5g27310.t1 | 5 | 18264591 | 18272278 | 1293 | 430 |
|  | **HDAC-SRT** |  |  |  |  |  |  |  |
| *FvSRT1* | XP_004288152.1 | gene16117 | FvH4_1g24990.t1 | 1 | 12827016 | 12832878 | 1164 | 387 |
| *FvSRT2* | XP_004291806.1 | gene15261 | FvH4_3g29170.t1 | 2 | 31898998 | 31906357 | 1419 | 472 |
|  | **HDAC-HDT** |  |  |  |  |  |  |  |
| *FvHDT1* | XP_004294038.1 | gene14356 | FvH4_3g29940.t1 | 3 | 8787298 | 8790296 | 894 | 297 |
| *FvHDT2* | XP_011466800.1 | gene30136 | FvH4_6g17790.t1 | 6 | 13196563 | 13200064 | 810 | 269 |

**Additional file 2: Table S2.** Tandem duplication events in strawberry (F. vesca) genome.

| **Gene name** | **Chromosome** | **Start** | **End** |
| --- | --- | --- | --- |
| *FvSDG14* | 2 | 19296794 | 19299681 |
| *FvSDG15* | 2 | 19316468 | 19329080 |
| *FvHAG15* | 4 | 15691816 | 15692594 |
| *FvHAG16* | 4 | 15692650 | 15693822 |
| *FvHAG19* | 5 | 3934893 | 3935931 |
| *FvHAG20* | 5 | 3936402 | 3936953 |
| *FvSDG37* | 6 | 36623729 | 36630106 |
| *FvHAG30* | 6 | 36636483 | 36637395 |
| *FvHAG31* | 7 | 14961166 | 14962163 |
| *FvJMJ22* | 7 | 14989775 | 14997968 |
| *FvHAG33* | 7 | 19238174 | 19239842 |
| *FvSDG43* | 7 | 19275355 | 19280942 |
| *FvHAG35* | 7 | 21386216 | 21387509 |
| *FvSDG45* | 7 | 21387556 | 21394750 |

**Additional file 3: Table S3.** Segmental duplication events in strawberry (F. vesca) genome.

| **Region 1 (*Fragaria vesca***) | | | | | **Region 2 (*Fragaria vesca***) | | | | | **ka** | **ks** | **ka/ks** |
| --- | --- | --- | --- | --- | --- | --- | --- | --- | --- | --- | --- | --- |
| **Gene name** | **Gene ID** | **Chr** | **Start** | **End** | **Gene name** | **Gene ID** | **Chr** | **Start** | **End** |
| FvHAG3 | gene05728 | 1 | 14213687 | 14215501 | FvHAG5 | gene25543 | 2 | 3889421 | 3891085 | 0.246 | 1.8036 | 0.14 |
| FvSDG10 | gene08324 | 2 | 6705424 | 6711297 | FvSDG33 | gene16684 | 6 | 1216090 | 1220950 | 0.4593 | 2.5709 | 0.18 |
| FvHDT1 | gene14356 | 3 | 8787298 | 8790296 | FvHDT2 | gene30136 | 6 | 13196563 | 13200064 | 0.7787 | 1.6752 | 0.46 |
| FvJMJ20 | gene04808 | 7 | 8381034 | 8392654 | FvJMJ15 | gene22017 | 5 | 25904018 | 25913180 | 0.4104 | 0.8626 | 0.48 |
| FvJMJ23 | gene12874 | 7 | 21486523 | 21491646 | FvJMJ19 | gene19156 | 7 | 3475363 | 3485606 | 0.4524 | 1.8399 | 0.25 |

Additional file 4: Table S4. Segmental duplication events in A. thaliana and strawberry (F. vesca).

| **Region 1 (**Arabidopsis thaliana**)** | | | | | **Region 2 (**Fragaria vesca**)** | | | | | **ka** | **ks** | **ka/ks** |
| --- | --- | --- | --- | --- | --- | --- | --- | --- | --- | --- | --- | --- |
| **Gene name** | **Gene ID** | **Chr** | **Start** | **End** | **Gene name** | **Gene ID** | **Chr** | **Start** | **End** |
| *AtSDG5* | At1g02580 | 1 | 544733 | 549202 | *FvSDG30* | gene02275 | 5 | 24730501 | 24737036 | 0.7959 | 1.7441 | 0.46 |
| *AtSDG13* | At1g04050 | 1 | 1045598 | 1049477 | *FvSDG10* | gene08324 | 2 | 6705424 | 6711297 | 0.585 | 2.2456 | 0.26 |
| *AtJMJ16* | At1g08620 | 1 | 2736854 | 2743881 | *FvJMJ16* | gene16665 | 6 | 1114093 | 1121674 | 0.3703 | 1.6432 | 0.23 |
| *AtSDG41* | At1g43245 | 1 | 16308549 | 16311094 | *FvSDG12* | gene08123 | 2 | 13998811 | 14002245 | 0.5225 | 1.4539 | 0.36 |
| *AtJMJ17* | At1g63490 | 1 | 23544656 | 23552384 | *FvJMJ8* | gene32474 | 5 | 1369297 | 1381810 | 0.355 | 1.6792 | 0.21 |
| *AtHAC2* | At1g67220 | 1 | 25145587 | 25150558 | *FvHAC3* | gene10338 | 6 | 30305982 | 30313383 | 0.8117 | 1.7318 | 0.47 |
| *AtSDG8* | At1g77300 | 1 | 29039922 | 29049454 | *FvSDG15* | gene11269 | 2 | 19316468 | 19329080 | 0.7614 | 1.6122 | 0.47 |
| *AtHAC1* | At1g79000 | 1 | 29716350 | 29724635 | *FvHAC2* | gene05506 | 6 | 25560774 | 25571014 | 0.271 | 2.3232 | 0.12 |
| *AtPRMT12* | At2g19670 | 2 | 8499000 | 8501294 | *FvPRMT2* | gene11395 | 1 | 5411620 | 5415093 | 0.3763 | 1.3884 | 0.27 |
| *AtSDG1* | At2g23380 | 2 | 9955092 | 9960386 | *FvSDG4* | gene23813 | 1 | 10738494 | 10745642 | 0.2472 | 1.5094 | 0.16 |
| *AtSDG6* | At2g23740 | 2 | 10097479 | 10103319 | *FvSDG32* | gene29411 | 5 | 26440292 | 26451084 | 0.388 | 1.8107 | 0.21 |
| *AtSDG31* | At3g04380 | 3 | 1161366 | 1164977 | *FvSDG33* | gene16684 | 6 | 1216090 | 1220950 | 0.4739 | 2.0406 | 0.23 |
| *AtPRMT13* | At3g06930 | 3 | 2185143 | 2189387 | *FvPRMT3* | gene06895 | 4 | 11180791 | 11185970 | 0.197 | 2.5715 | 0.08 |
| *AtHDMA1* | At3g10390 | 3 | 3229293 | 3232345 | *FvHDMA8* | gene23463 | 7 | 14721336 | 14726713 | 0.2203 | 1.9565 | 0.11 |
| *AtHAC5* | At3g12980 | 3 | 4146399 | 4154895 | *FvHAC2* | gene05506 | 6 | 25560774 | 25571014 | 0.4109 | 1.6524 | 0.25 |
| *AtHDA15* | At3g18520 | 3 | 6361176 | 6365615 | *FvHDA7* | gene26215 | 5 | 6961304 | 6967295 | 0.2051 | 1.1952 | 0.17 |
| *AtSDG36* | At3g21820 | 3 | 7688434 | 7691567 | *FvSDG3* | gene23908 | 1 | 9686207 | 9689488 | 0.24 | 1.6038 | 0.15 |
| *AtHDT1* | At3g44750 | 3 | 16297656 | 16299876 | *FvHDT2* | gene30136 | 6 | 13196563 | 13200064 | 0.7667 | 1.9569 | 0.39 |
| *AtJMJ12* | At3g48430 | 3 | 17935256 | 17940792 | *FvJMJ10* | gene09903 | 5 | 6233535 | 6240416 | 0.3799 | 1.9112 | 0.20 |
| *AtSDG10* | At4g02020 | 4 | 886580 | 891987 | *FvSDG30* | gene02275 | 5 | 24730501 | 24737036 | 0.5145 | 2.2882 | 0.22 |
| *AtPRMT11* | At4g29510 | 4 | 14491622 | 14494001 | *FvPRMT2* | gene11395 | 1 | 5411620 | 5415093 | 0.3849 | 1.4267 | 0.27 |
| *AtPRMT15* | At4g31120 | 4 | 15132011 | 15136696 | *FvPRMT5* | gene15464 | 6 | 20640431 | 20647130 | 0.1762 | 1.5807 | 0.11 |
| *AtHDA19* | At4g38130 | 4 | 17896278 | 17899509 | *FvHDA3* | gene17127 | 2 | 8294060 | 8298132 | 0.1128 | 2.1777 | 0.05 |
| *AtHDT3* | At5g03740 | 5 | 981859 | 984289 | *FvHDT2* | gene30136 | 6 | 13196563 | 13200064 | 0.5767 | 2.0184 | 0.29 |
| *AtJMJ11* | At5g04240 | 5 | 1169153 | 1174992 | *FvJMJ22* | gene23255 | 7 | 14989775 | 14997968 | 0.4381 | 1.7814 | 0.25 |
| *AtJMJ22* | At5g06550 | 5 | 2001071 | 2003112 | *FvJMJ18* | gene18131 | 6 | 19669998 | 19673219 | 0.1899 | 1.5667 | 0.12 |
| *AtSDG38* | At5g06620 | 5 | 2033760 | 2036266 | *FvSDG34* | gene18071 | 6 | 19145167 | 19149013 | 0.2682 | 1.5403 | 0.17 |
| *AtSDG40* | At5g17240 | 5 | 5666823 | 5668907 | *FvSDG7* | gene31667 | 1 | 20998576 | 21004362 | 0.3675 | 1.8838 | 0.20 |
| *AtSDG34* | At5g24330 | 5 | 8295110 | 8297159 | *FvSDG44* | gene12820 | 7 | 21173031 | 21176128 | 0.2079 | 2.3561 | 0.09 |
| *AtSDG18* | At5g43990 | 5 | 17697875 | 17702034 | *FvSDG10* | gene08324 | 2 | 6705424 | 6711297 | 0.5455 | 1.8977 | 0.29 |
| *AtPRMT14* | At5g49020 | 5 | 19871191 | 19874974 | *FvPRMT3* | gene06895 | 4 | 11180791 | 11185970 | 0.1917 | 1.6833 | 0.11 |
| *AtHAG3* | At5g50320 | 5 | 20480626 | 20484945 | *FvHAG21* | gene09922 | 5 | 6350369 | 6353407 | 0.0609 | 1.4023 | 0.04 |
| *AtSDG29* | At5g53430 | 5 | 21677146 | 21684122 | *FvSDG45* | gene12861 | 7 | 21387556 | 21394750 | 0.239 | 1.3929 | 0.17 |
| *AtHAG2* | At5g56740 | 5 | 22952767 | 22955739 | *FvHAG1* | gene11375 | 1 | 5306881 | 5310247 | 0.3104 | 1.9062 | 0.16 |
| *AtJMJ20* | At5g63080 | 5 | 25299933 | 25302476 | *FvJMJ9* | gene31779 | 5 | 3338046 | 3341917 | 0.3579 | 1.6455 | 0.22 |

**Additional file 5: Table S5.** Primers used for vector construction. The underline represents the sequence of the vector.

| **Primer name** | Sequence (5’-3’) | Product length |
| --- | --- | --- |
| *FaHDT1*-RNAi F | GGGGACAAGTTTGTACAAAAAAGCAGGCTATGGAGTTCTGGGGTGTTGAAGTGA | 357 |
| *FaHDT1*-RNAi R | GGGGACCACTTTGTACAAGAAAGCTGGGTCACTGGGAGTTCTTCCTCCTCTTCT |
| *FaHDT2*-RNAi F | GGGGACAAGTTTGTACAAAAAAGCAGGCTATGGCCAGCAAGATGAGGTTTTGGG | 363 |
| *FaHDT2*-RNAi R | GGGGACCACTTTGTACAAGAAAGCTGGGTGGATTTAATTTCATTCTTAGCTTCC |
| *FaHDT1*-pCAMBIA2300-F | GCTCTAGAATGGAGTTCTGGGGTGTTGAAG | 894 |
| *FaHDT1*-pCAMBIA2300-R | GGGGTACCCTACTTTCCAGCACTATGCTTGGC |
| *FaHDT2*-pCAMBIA2300-F | GCTCTAGAATGGCCAGCAAGATGAGGTTT | 810 |
| *FaHDT2*-pCAMBIA2300-R | GGGGTACCTTACTTTGCAGCTCCATGCTTTG |
| *FaHDT1*-RT-qPCR F | GAGACACCAGCCCCTAAGAAG | 240 |
| *FaHDT1*-RT-qPCR R | GGAGCCACAAGAGAAATTACCAC |
| *FaHDT2*-RT-qPCR F | AGAGTGTGGAAGATGGCAGT | 254 |
| *FaHDT2*-RT-qPCR R | CTGTTTTGAAGGGTAAGGAGTTG |

**Additional file 6: Figure S1.** Expression profiles of *FvHM* genes in various tissues and different fruit ripening stages. Transcriptome data were log2-transformed to generate heat-maps using MultiExperiment Viewer software. R, ‘Ruegen’ strawberry; Y, ‘Yellow Wonder’ strawberry; DPA, days post anthesis.


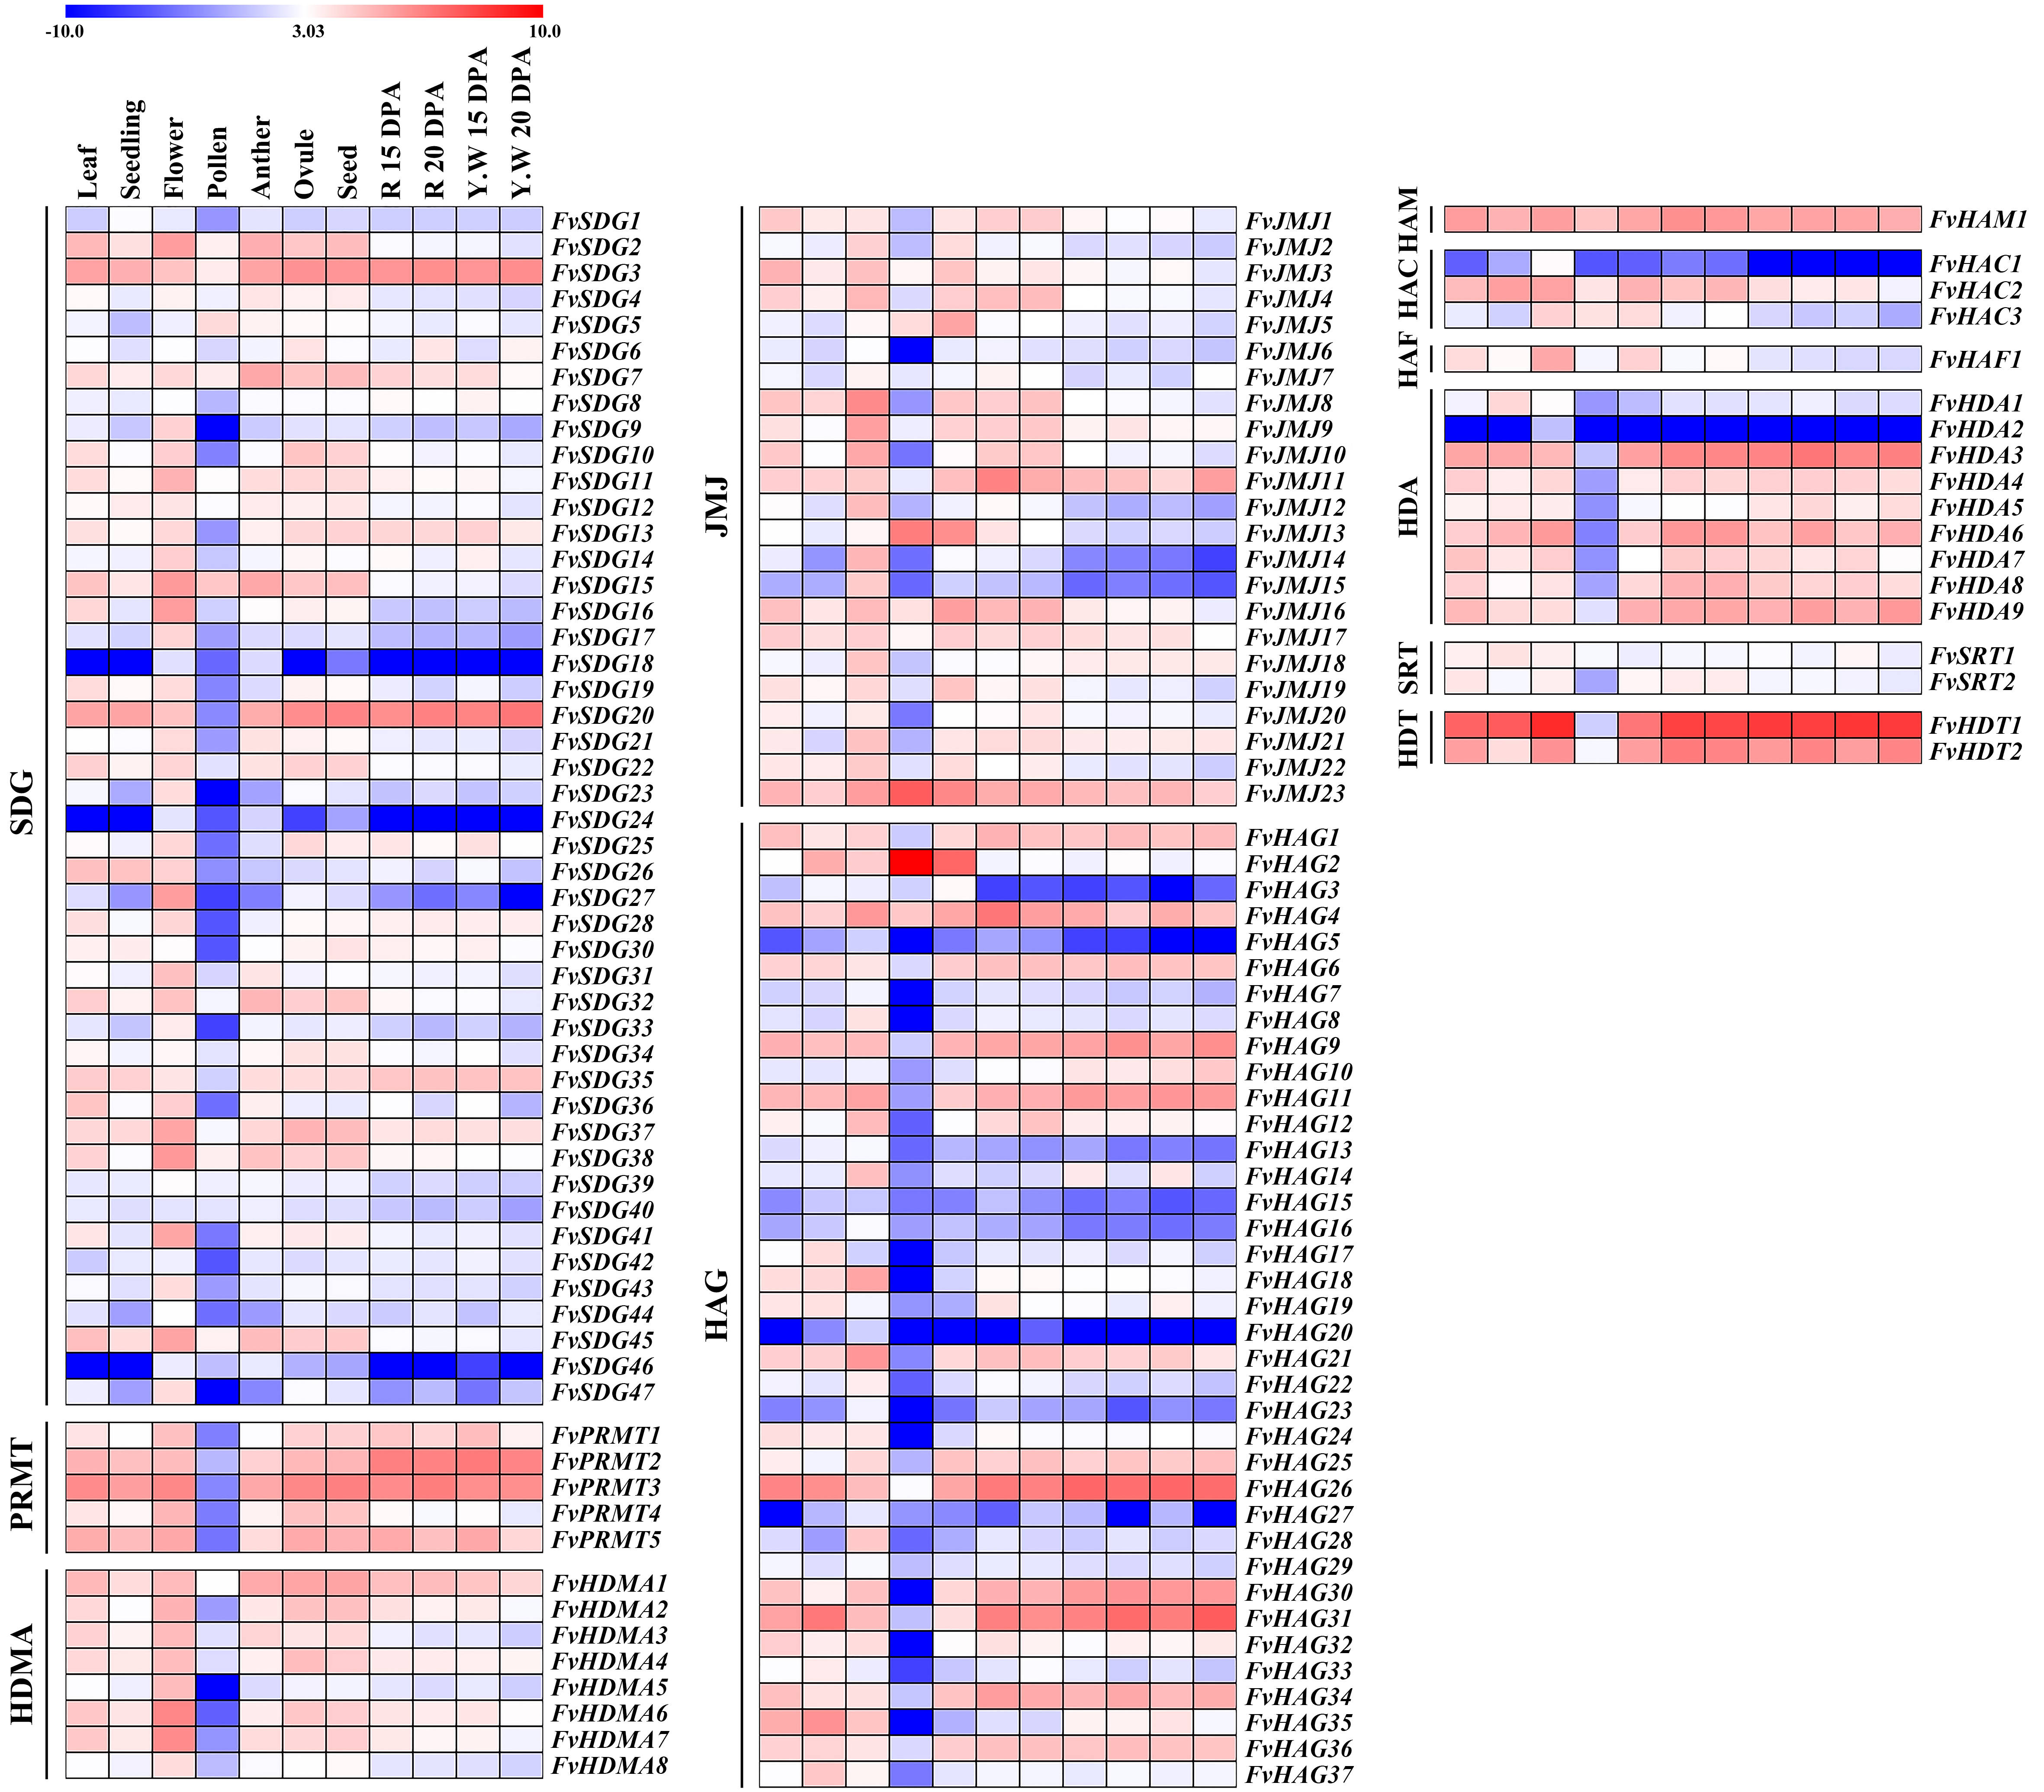

Supplement: Supplementary file 1 [file e885637aa6757916341f8afe.doc]
